# Supplementary material for: Association between processed and unprocessed red meat consumption and risk of nonalcoholic fatty liver disease: A systematic review and dose-response meta-analysis
Source: PubMed Central journal article supplement (PMC11046257; doi:10.7189/jogh.14.04060), 2024-04-26
Supplement: jogh-14-04060-s001.pdf [file jogh-14-04060-s001.pdf]

**Appendix to Association between Processed and Unprocessed Red Meat Consumption and Risk of Non-alcoholic Fatty Liver Disease: A Systematic Review and Dose-response Meta-analysis**

The example of search strategy:

((("non-alcoholic" OR "nonalcoholic" OR "steatohepatitis") AND ("fatty liver")) OR "NAFLD" OR "non-alcoholic fatty liver disease" OR "nonalcoholic fatty liver disease" OR "NASH" OR "NAFL" OR "metabolic dysfunction-associated fatty liver disease" OR "mafld") AND ("meat" OR "beef" OR "veal" OR "hot dog" OR "salami" OR "sausage" OR "lamb" OR "bacon" OR "deli meat" OR "pastrami" OR "hamburger" OR "schnitzel" OR "diet").

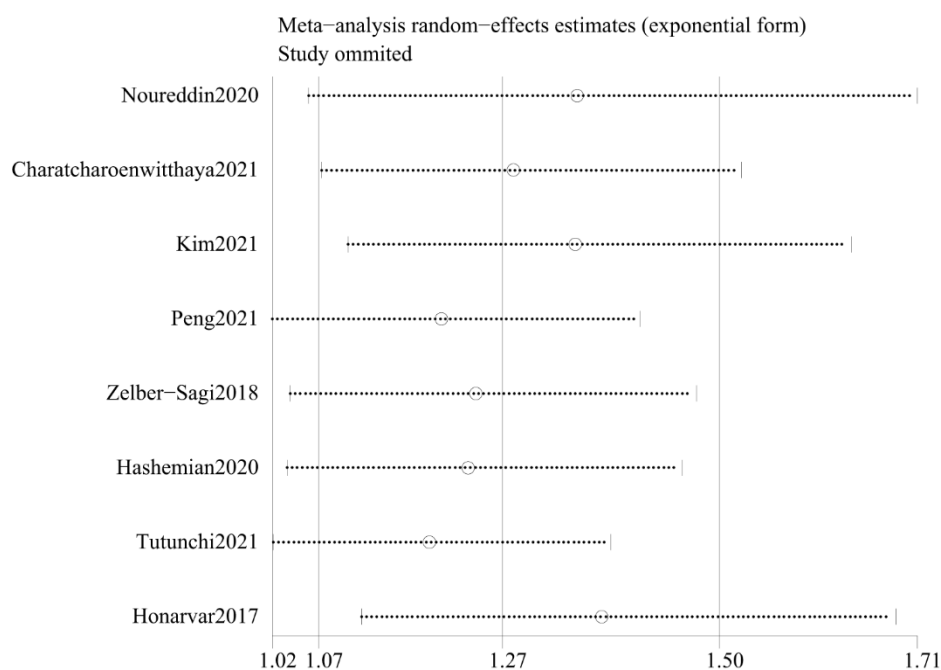

**Figure S1.** Sensitive analysis for red meat

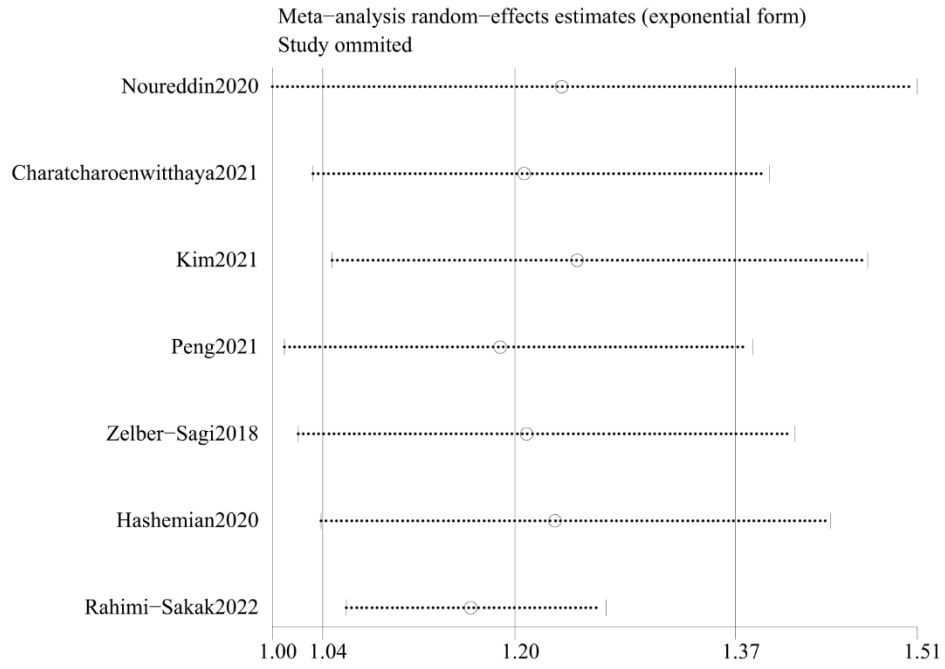

**Figure S2.** Sensitive analysis for processed red meat

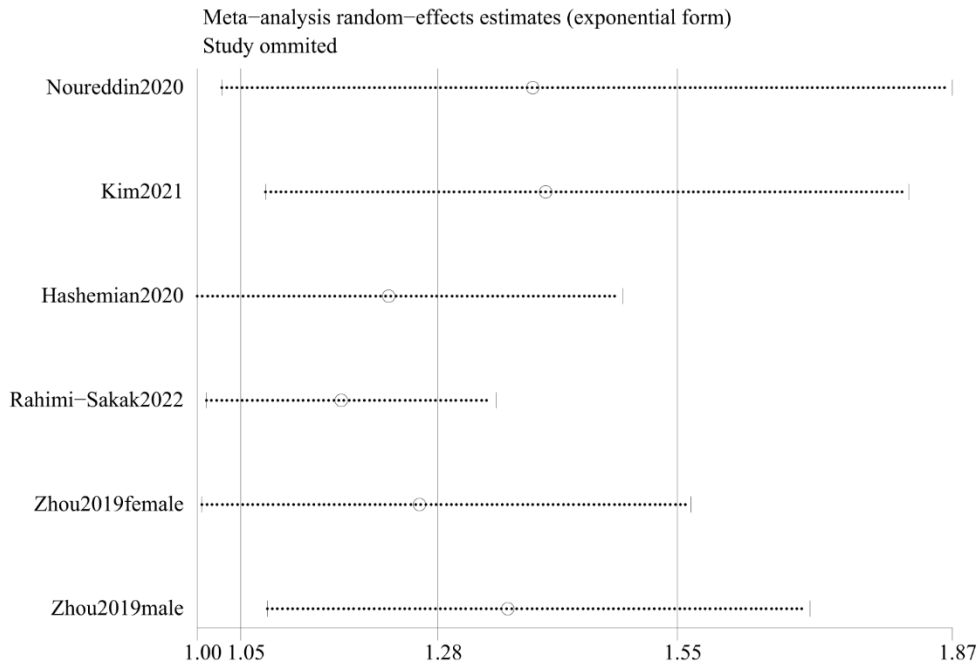

**Figure S3.** Sensitive analysis for unprocessed red meat

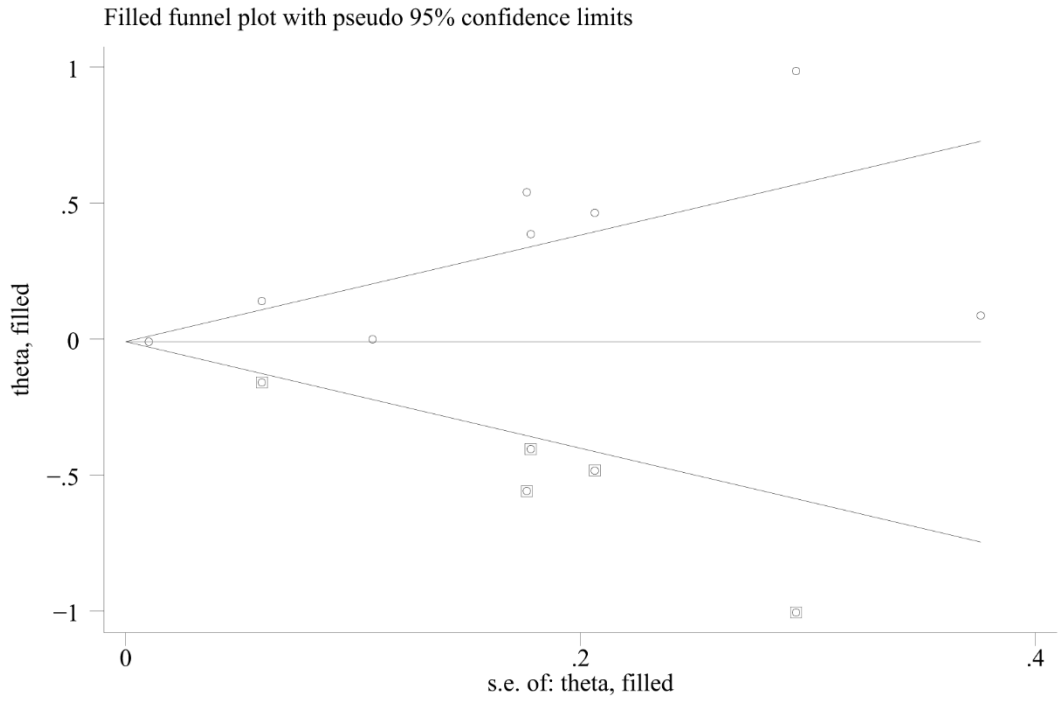

**Figure S4.** trim-and-fill funnel plot for red meat

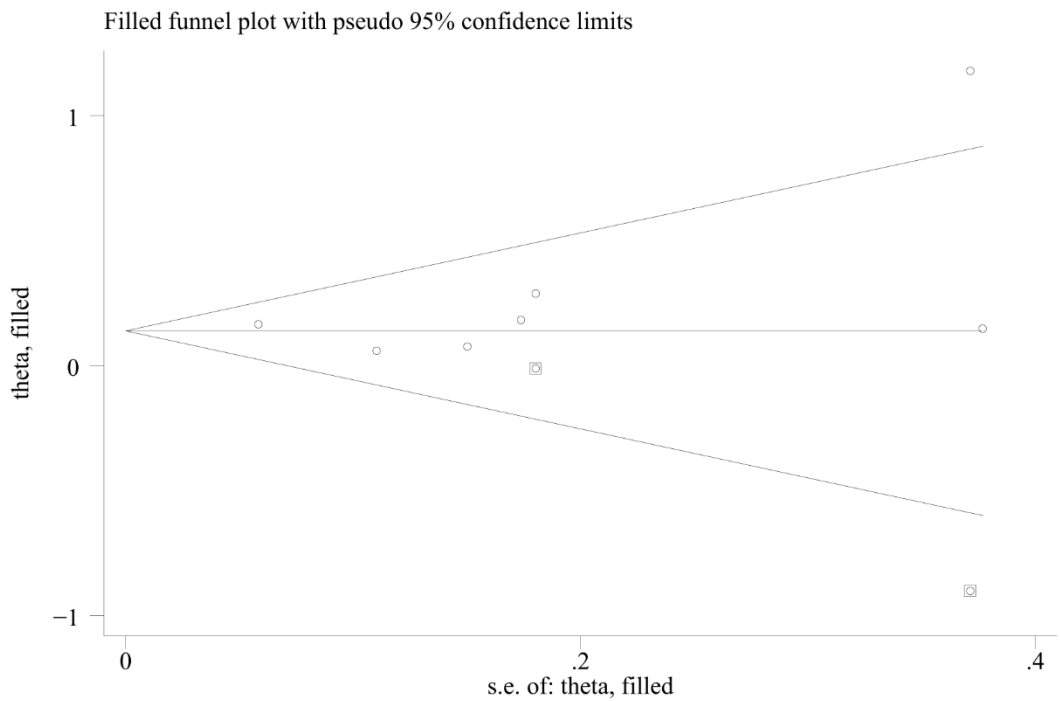

**Figure S5.** trim-and-fill funnel plot for processed red meat

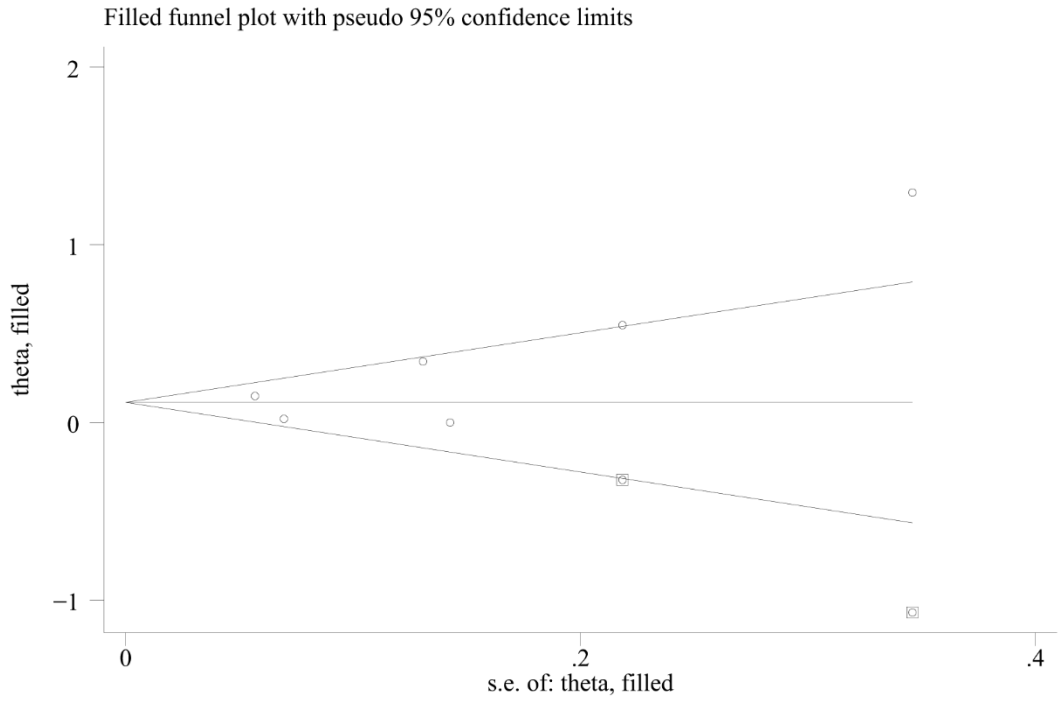

**Figure S6.** trim-and-fill funnel plot for unprocessed red meat

**Table S1.** Definitions of red meat, unprocessed red meat and processed meat used in studies included in the systematic review.

| Study ID                 | Red meat                 |                                                                                                              | Unprocessed red meat              |                                                                                                                                            | Processed red meat       |                                                                                                              |
|--------------------------|--------------------------|--------------------------------------------------------------------------------------------------------------|-----------------------------------|--------------------------------------------------------------------------------------------------------------------------------------------|--------------------------|--------------------------------------------------------------------------------------------------------------|
|                          | Terminology in the study | Description in the study                                                                                     | Terminology in the study          | Description in the study                                                                                                                   | Terminology in the study | Description in the study                                                                                     |
| Noureddin2020            | Red meat                 | none                                                                                                         | red meat excluding processed meat | none                                                                                                                                       | Processed red meat       | none                                                                                                         |
| Charatcharoenwithaya2021 | Red meat                 | none                                                                                                         | none                              | none                                                                                                                                       | none                     | none                                                                                                         |
| Kim2021                  | Total red meat           | none                                                                                                         | unprocessed red meat              | unprocessed red meat intake included, “beef, pork or lamb as main dish”, “hamburger”, and “beef, pork or lamb as a sandwich or mixed dish” | processed red meat       | Processed red meat included “bacon”, “hot dogs”, and “sausage, salami, bologna and other processed red meat” |
| Peng2021                 | none                     | none                                                                                                         | Red meat                          | Red meat consisted of pork, beef and lamb                                                                                                  | none                     | none                                                                                                         |
| Zelber-Sagi2018          | Total red meat           | Total red meat was composed of: beef steak or roast, beef internal organs, fried beef patties, lamb and pork | none                              | none                                                                                                                                       | processed meat           | Processed meat included: hamburger, salami, pastrami, sausages, processed schnitzel and canned meat          |

|                  |                        |                                                                                                                                                                          |                      |                                                                          |                |                                      |
|------------------|------------------------|--------------------------------------------------------------------------------------------------------------------------------------------------------------------------|----------------------|--------------------------------------------------------------------------|----------------|--------------------------------------|
| Hashemian2020    | Total red meat         | total red meat intake including unprocessed meat (lamb, beef, and hamburger), organ meat (liver, kidney, gizzard, and heart), and processed meat (sausage and deli meat) | unprocessed red meat | unprocessed meat (lamb, beef, and hamburger)                             | none           | none                                 |
| Zhou2019         | none                   | none                                                                                                                                                                     | Red meat             | Red meat intake was defined as the total amount of pork, beef and mutton | none           | none                                 |
| Tutunchi2021     | Red and processed meat | Red and processed meat: Beef, lamb, camel, sausages, hamburger, processed meats, organ meats                                                                             | none                 | none                                                                     | none           | none                                 |
| Rahimi-Sakak2022 | none                   | none                                                                                                                                                                     | Red meat             | red meat (beef or lamb or ground red meat)                               | processed meat | processed meat (sausages or burgers) |
| Honarvar2017     | red meat               | none                                                                                                                                                                     | none                 | none                                                                     | none           | none                                 |

**Table S2.** Quality of the studies included in the meta-analysis according to Newcastle-Ottawa Scale.

| Risk Bias Assessment using Newcastle-Ottawa Scale for cross-sectional studies |                                   |             |                 |                                  |                                            |                       |                  |             |
|-------------------------------------------------------------------------------|-----------------------------------|-------------|-----------------|----------------------------------|--------------------------------------------|-----------------------|------------------|-------------|
| Study                                                                         | selection                         |             |                 |                                  | Comparability based on design and analysis | outcome               |                  | Total score |
|                                                                               | Representativeness of the samples | Sample size | Non-respondents | Ascertainment of red meat eating |                                            | Assessment of outcome | Statistical test |             |
| Charatcharoenwitthaya2021                                                     | 0                                 | 0           | 0               | 0                                | 1                                          | 0                     | 1                | 2           |
| Peng2021                                                                      | 0                                 | 0           | 1               | 2                                | 0                                          | 1                     | 1                | 5           |

|                 |   |   |   |   |   |   |   |   |
|-----------------|---|---|---|---|---|---|---|---|
| Zelber-Sagi2018 | 0 | 0 | 0 | 2 | 2 | 1 | 1 | 6 |
| Zhou2019        | 1 | 0 | 1 | 1 | 1 | 1 | 1 | 6 |
| Honarvar2017    | 1 | 1 | 1 | 2 | 1 | 0 | 1 | 7 |

**Risk Bias Assessment using Newcastle-Ottawa Scale for cohort studies**

| Study         | Selection                                |                                     |                           |                                                                          | Comparability of cohorts on the basis of the design or analysis controlled for confounders | Outcome               |                                                 |                       | Total score |
|---------------|------------------------------------------|-------------------------------------|---------------------------|--------------------------------------------------------------------------|--------------------------------------------------------------------------------------------|-----------------------|-------------------------------------------------|-----------------------|-------------|
|               | Representativeness of the exposed cohort | Selection of the non-exposed cohort | Ascertainment of exposure | Demonstration that outcome of interest was not present at start of study |                                                                                            | Assessment of outcome | Was follow-up long enough for outcomes to occur | Adequacy of follow-up |             |
| Kim2021       | 1                                        | 1                                   | 1                         | 1                                                                        | 2                                                                                          | 0                     | 1                                               | 1                     | 8           |
| Hashemian2020 | 1                                        | 1                                   | 1                         | 0                                                                        | 2                                                                                          | 0                     | 1                                               | 1                     | 7           |
| Noureddin2020 | 1                                        | 1                                   | 1                         | 1                                                                        | 2                                                                                          | 1                     | 1                                               | 1                     | 9           |

**Risk Bias Assessment using Newcastle-Ottawa Scale for case-control studies**

| Study            | Selection                        |                                 |                       |                        | Comparability of cases and controls based on the design or analysis | Outcome                |                                                     |                   | Total score |
|------------------|----------------------------------|---------------------------------|-----------------------|------------------------|---------------------------------------------------------------------|------------------------|-----------------------------------------------------|-------------------|-------------|
|                  | Is the case definition adequate? | Representativeness of the cases | Selection of controls | Definition of controls |                                                                     | Assessment of exposure | Same method of ascertainment for cases and controls | Non-response rate |             |
| Tutunchi2021     | 1                                | 0                               | 0                     | 1                      | 1                                                                   | 1                      | 1                                                   | 0                 | 5           |
| Rahimi-Sakak2022 | 1                                | 0                               | 0                     | 1                      | 1                                                                   | 1                      | 0                                                   | 1                 | 5           |

**Table S3.** Results of publication bias

|                      | Egger's test | before trim-and-fill |                     |              | after trim-and-fill |                     |              |
|----------------------|--------------|----------------------|---------------------|--------------|---------------------|---------------------|--------------|
|                      |              | point estimation     | interval estimation | study number | point estimation    | interval estimation | study number |
| red meat             | 0.008        | 1.267                | (1.073, 1.496)      | 8            | 0.994               | (0.863, 1.144)      | 13           |
| unprocessed red meat | 0.100        | 1.279                | (1.053, 1.552)      | 6            | 1.129               | (0.909, 1.401)      | 8            |
| processed red meat   | 0.298        | 1.195                | (1.043, 1.370)      | 7            | 1.136               | (0.965, 1.339)      | 9            |
